# Supplementary material for: The influence of genetic architecture on responses to selection under drought in rice
Source: PubMed Central journal article supplement (PMC9624088; doi:10.1111/eva.13419), 2022-06-06

1

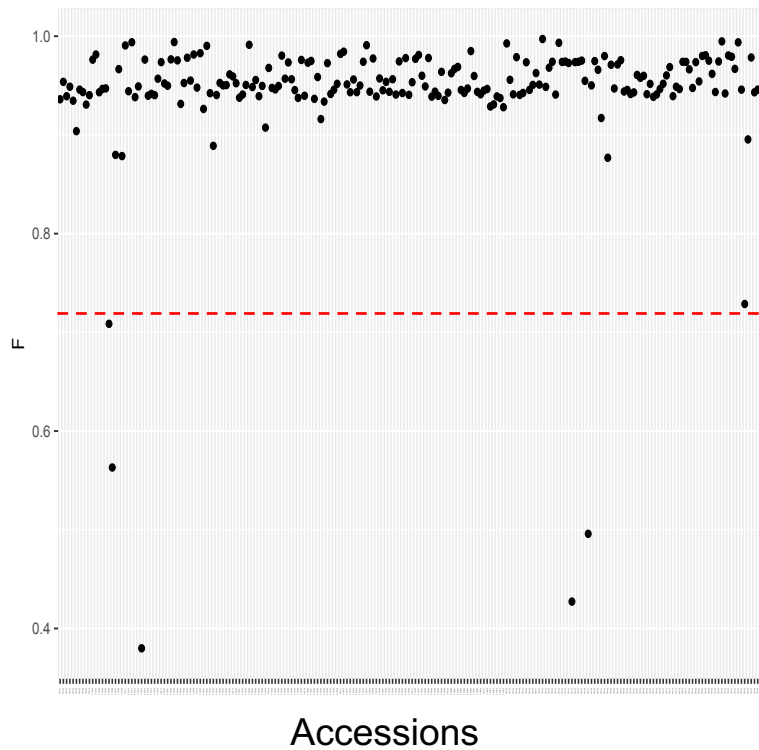

2

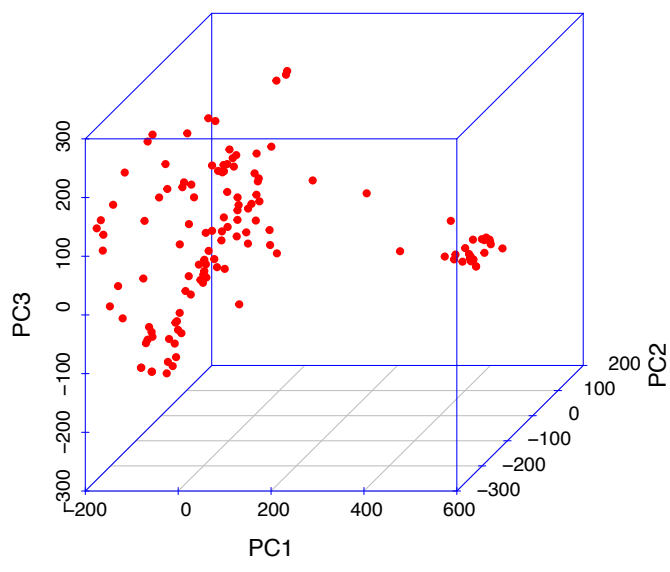

3

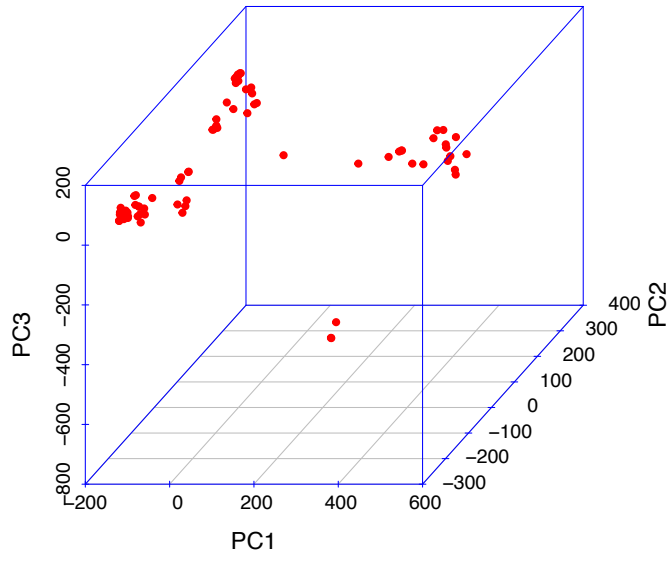

Wet

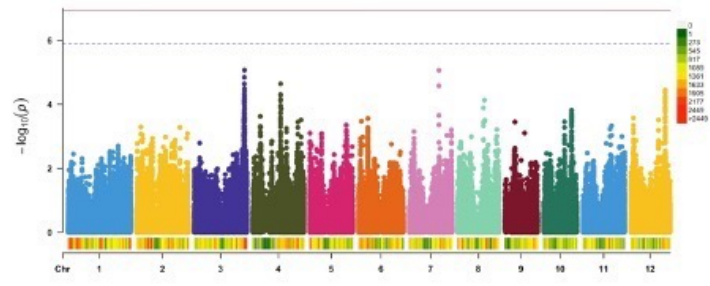

LOP

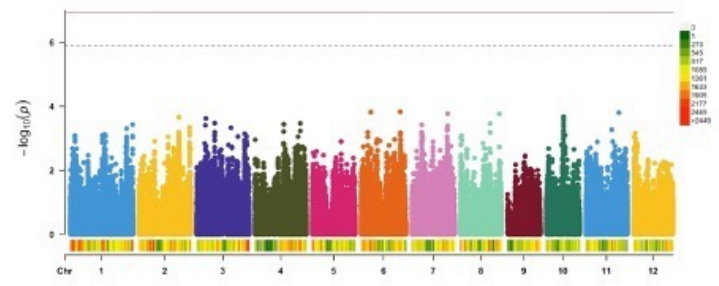

Dry

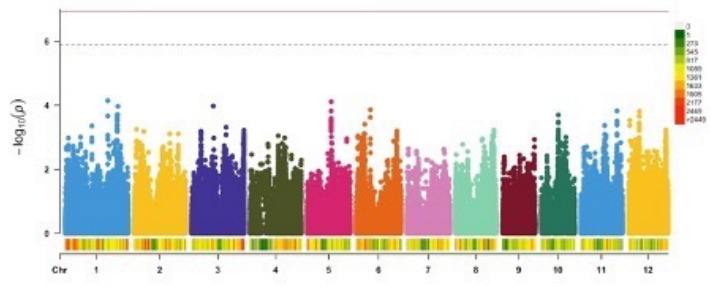

WUE

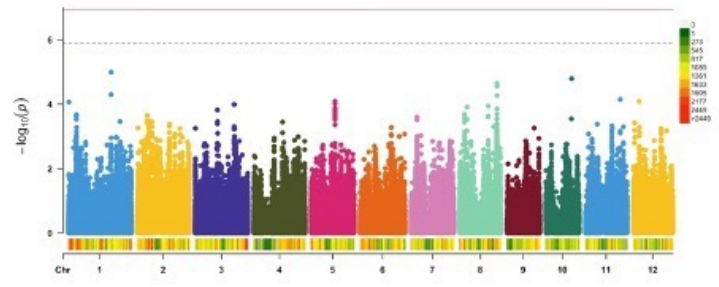

XHS

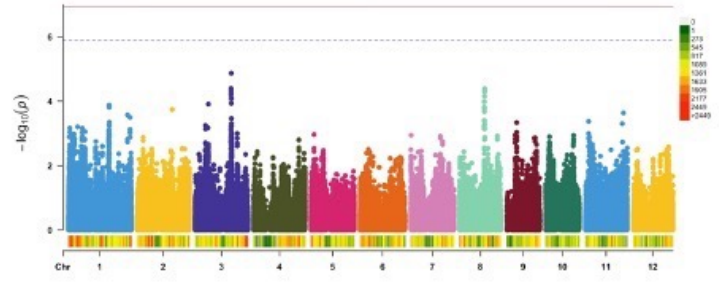

INDICA

Wet

Dry

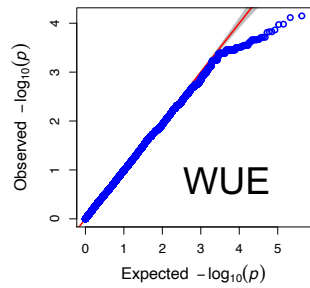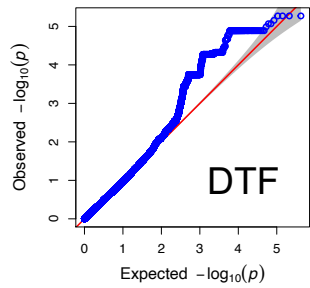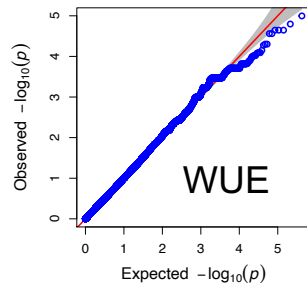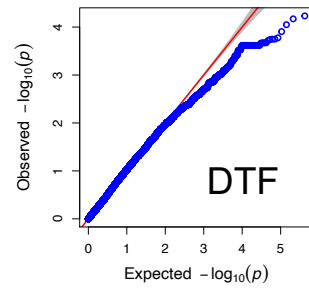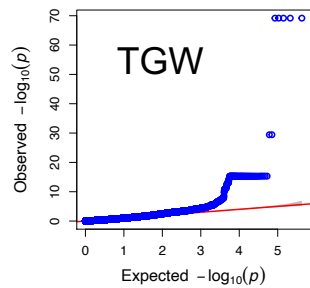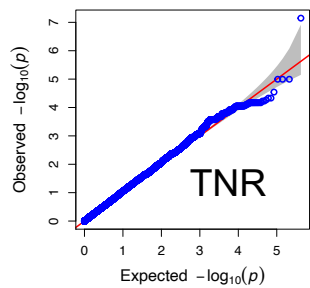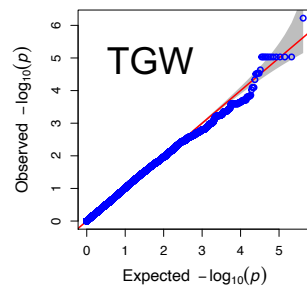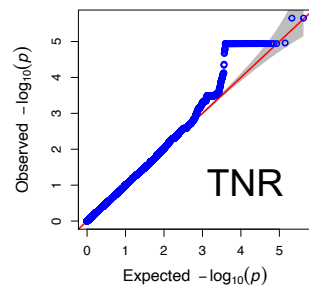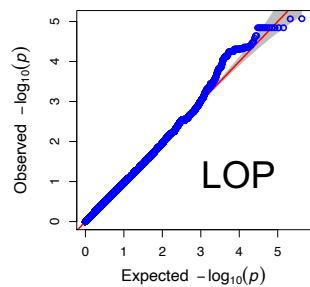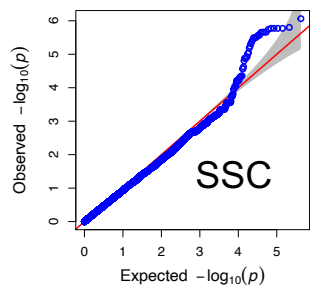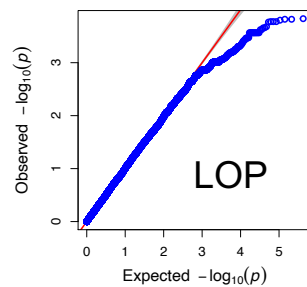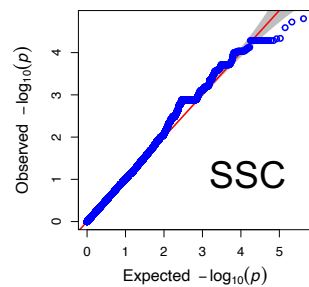

INDICA

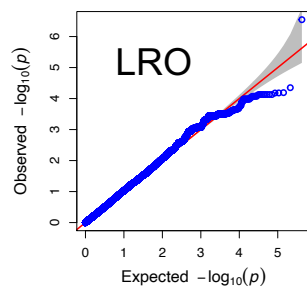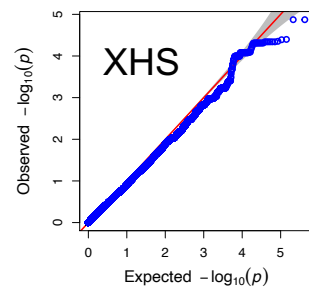

6

Wet

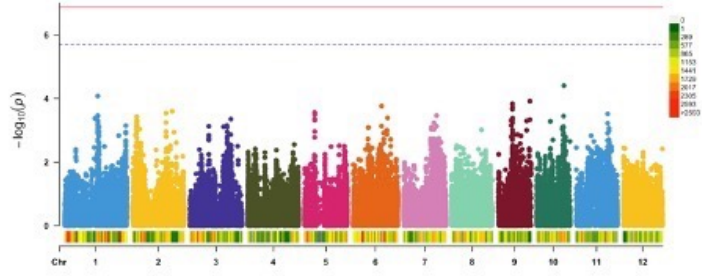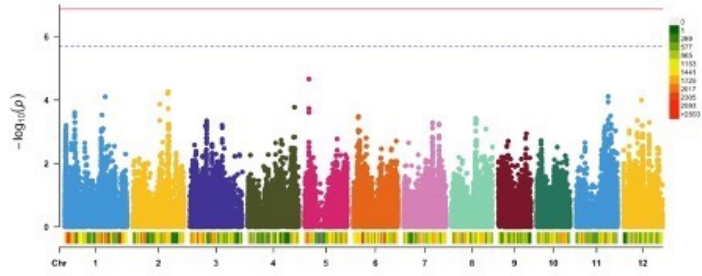

JAPONICA

LOP

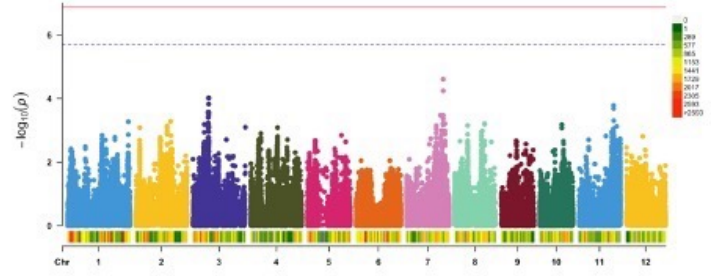

WUE

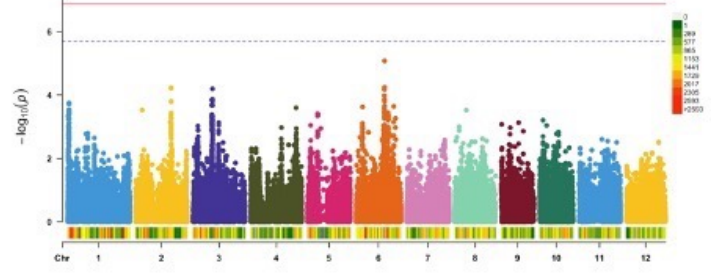

XHS

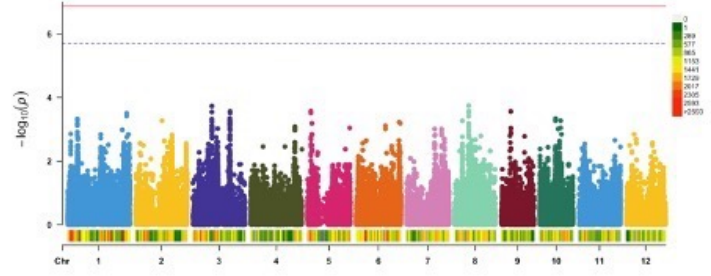



# Wet

# Dry

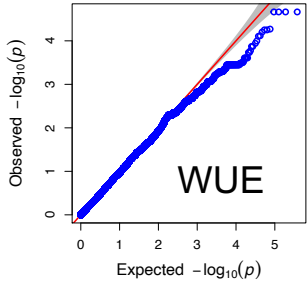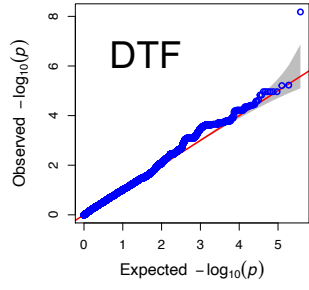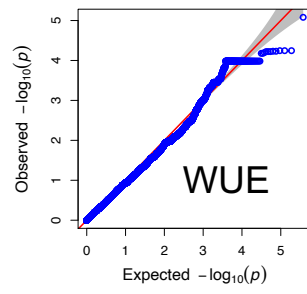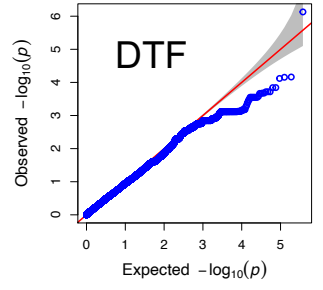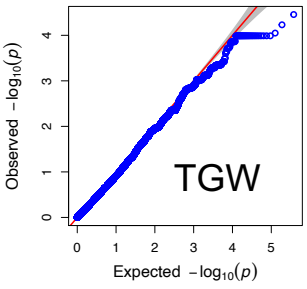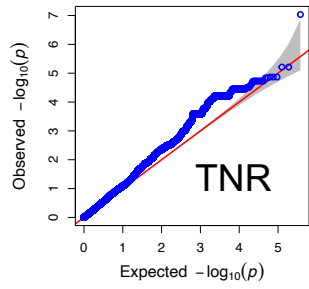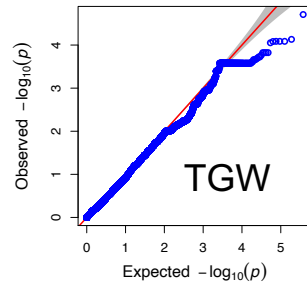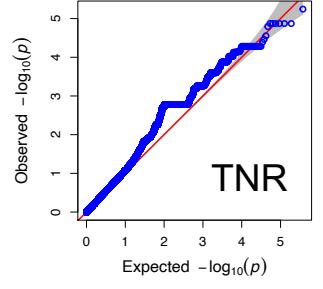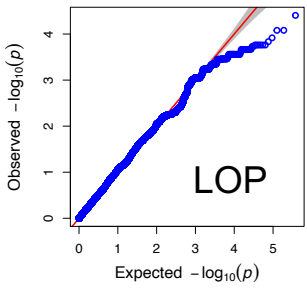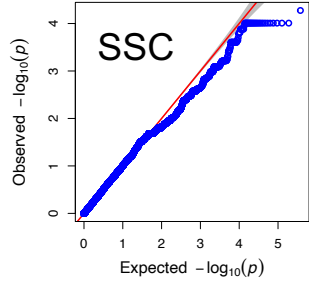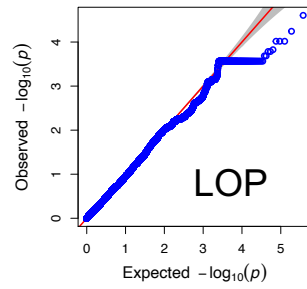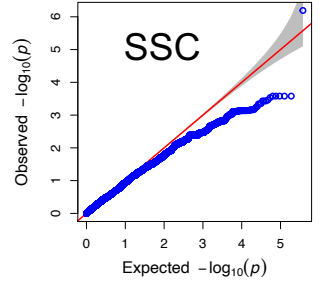

# JAPONICA

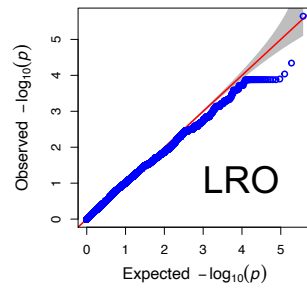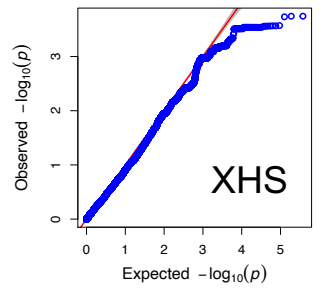

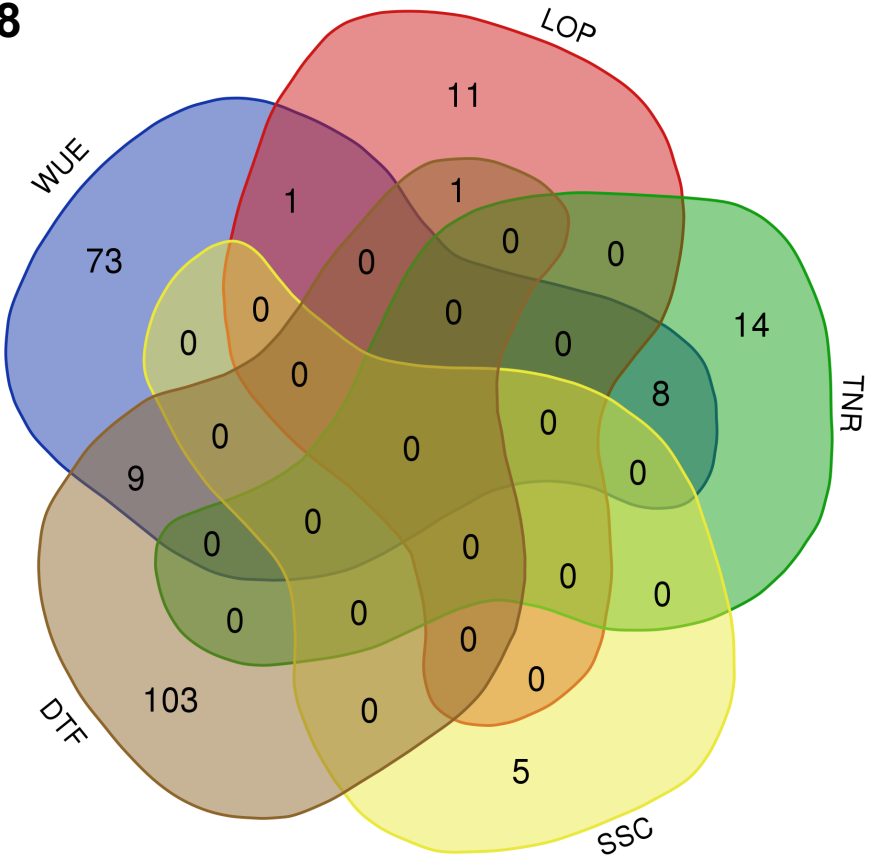

Supplement: EVA-15-1670-s007.pdf [file EVA-15-1670-s007.pdf]
